# Supplementary material
Source: publisher figshare collection journal article supplement (https://karger.figshare.com/ndownloader/files/25508351)
Supplement: Supplementary file 1 [file 25508351]

Supplementary data: Full electronic search strategy for performed on Pubmed and Embase on April 14th 2020.

**Pubmed**

(("child"[MeSH Terms] OR "child"[TiAb] OR "children"[TiAb]) OR ("adolescent"[MeSH Terms] OR "adolescent"[TiAb] OR "adolescents"[TiAb]) OR Juvenile[TiAb]) AND (Graves disease[MeSH terms] OR graves[All Fields] OR graves'[All Fields] OR graves''[All Fields] OR graves'disease[All Fields] OR graves'diseases[All Fields] OR graves'goiter[All Fields] OR graves'group[All Fields] OR graves'hyperthyroidism[All Fields] OR graves'patients[All Fields] OR graves's[All Fields] OR graves'trade[All Fields] OR graves`disease[All Fields] OR graves`ophthalmopathy[All Fields] AND (("thyroidectomy"[MeSH Terms] OR "thyroidectomy"[TiAb]) OR thyroid surgery[TiAb] OR ("surgery"[Subheading] OR "surgery"[TiAb] OR "surgical procedures, operative"[MeSH Terms] OR ("surgical"[TiAb] AND "procedures"[TiAb] AND "operative"[All Fields]) OR "operative surgical procedures"[All Fields] OR "surgery"[All Fields] OR "general surgery"[MeSH Terms] OR ("general"[All Fields] AND "surgery"[All Fields]) OR "general surgery"[All Fields])))

Results: 1228 articles were found
Limits: no limits were used.

**Embase**

(Child.af. OR child.ti,ab,kw. OR children.ti,ab,kw. OR adolescent.ti,ab,kw. OR adolescents.ti,ab,kw. OR juvenile.ti,ab,kw.) AND (''Graves disease''.ti,ab,kw. OR graves.af. OR graves hyperthyroidism.af. OR graves patients.af. OR grave's.af. OR graves disease''.af.) AND (Thyroidectomy.ti,ab,kw. OR thyroidsurgery.ti,ab,kw. OR surgery.af. OR operative.af. OR ''operative surgical procedure''.af. OR ''general surgery''.af.)

Results: 917 articles were found.
limits: no limits were used
